# Supplementary material for: In situammonia removal by methanogenic granular biomass
Source: Royal Society of Chemistry journal article supplement (doi:10.1039/c7ew00444c), 2018-01-01

**Fig S1: Percentage distribution of methanogenic population in the initial methanogenic inoculum**

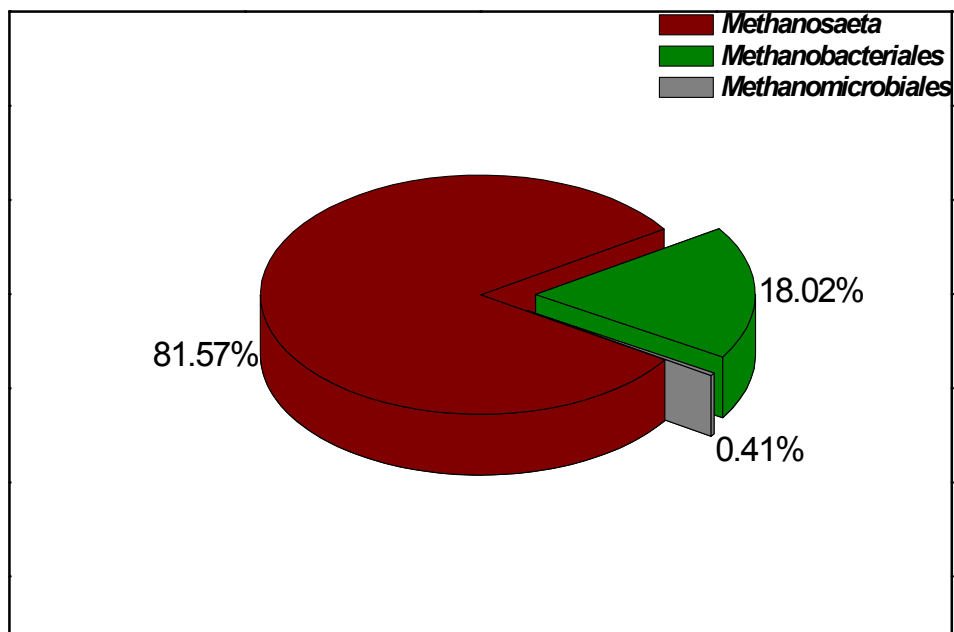

Supplement: c7ew00444c1.pdf [file c7ew00444c1.pdf]
