# Supplementary material for: In situammonia removal by methanogenic granular biomass
Source: Royal Society of Chemistry journal article supplement (doi:10.1039/c7ew00444c), 2018-01-01
Supplement: c7ew00444c3.pdf [file c7ew00444c3.pdf]

**Table S1: Quality control data of Real Time PCR analysis**

| <b>Target</b>             | <b>Slope</b> | <b>R<sup>2</sup></b> | <b>Efficiency (%)</b> | <b>Detection limit (copies/g)</b> |
|---------------------------|--------------|----------------------|-----------------------|-----------------------------------|
| <i>Methanosaetaceae</i>   | -4.162       | 0.994                | 73.879                | 1.53E+04                          |
| <i>Methanosarcinaceae</i> | -4.553       | 0.998                | 65.825                | 1.45E+04                          |
| <i>Methanobacteriales</i> | -4.262       | 0.998                | 71.647                | 1.18E+04                          |
| <i>Methanomicrobiales</i> | -3.908       | 0.998                | 80.246                | 1.08E+04                          |
| Anammox                   | -3.119       | 0.992                | 109.241               | 4.15E+04                          |
| AOB                       | -3.087       | 0.995                | 110.838               | 8.46E+04                          |
| NOB                       | -2.228       | 0.99                 | 181.017               | 5.63E+04                          |
